# Supplementary material for: Solvent extraction of U(vi) by task specific ionic liquids bearing phosphoryl groups
Source: Royal Society of Chemistry journal article supplement (doi:10.1039/b703642f), 2007-01-01
Supplement: b703642f.pdf [file b703642f.pdf]

## SUPPORTING INFORMATION

### SOLVENT EXTRACTION OF U(VI) BY TASK SPECIFIC IONIC LIQUIDS BEARING PHOSPHORYL GROUPS

Ali Ouadi, \*<sup>a</sup> Olga Klimchuk <sup>a, b</sup>, Clotilde Gaillard <sup>a</sup> and Isabelle Billard <sup>a</sup>

<sup>a</sup> Institut Pluridisciplinaire Hubert Curien, DRS, ULP, CNRS, IN2P3,  
23 rue du Læss, 67037 Strasbourg cedex 2, France

<sup>b</sup> Institute of Organic Chemistry, NASU, Kiev, Ukraine

**General Experimental Information:** <sup>1</sup>H and <sup>13</sup>C NMR spectra were recorded by using Bruker AC-300 spectrometer, <sup>31</sup>P NMR was recorded by using Bruker Avance serie 400 MHz spectrometer. CDCl<sub>3</sub> was used as NMR solvent. Chemical shifts are reported as  $\delta$  values in ppm relative to TMS in CDCl<sub>3</sub> for <sup>1</sup>H NMR and to external standard 85% H<sub>3</sub>PO<sub>4</sub> for <sup>31</sup>P NMR. Mass spectra were measured by using a microTOF (Bruker Daltonic) mass spectrometer.

#### Synthesis:

##### TSIL 2:

To a solution of 3-dimethylamino-1-propylamine (2.23 g, 21.9 mmol) and triethylamine (5.54 g, 55.00 mmol) in diethylether (60 ml) was added dropwise a solution of dibutylchlorophosphate (5.0 g, 21.9 mmol) in diethylether (20 ml) at 5°C under vigorous stirring. The reaction mixture was stirred for 10 h at room temperature then triethylamine chloride was removed by filtration. Evaporation of the solvent yielded the product as colourless oil (5.81 g, 93%). To this solution of dibutyl (*N,N*-dimethylpropylamine) phosphate (5.81 g, 19.8 mmol) in diethylether (60 ml) was added a solution of methyl iodide (2.96 g, 19.8 mmol) in diethylether (20 ml) at 5°C under vigorous stirring. The reaction mixture was stirred for 3 h at room temperature. The precipitate was filtered, washed with diethyl ether (3×20 ml) and dried under reduced pressure yielding the product as a white solid (8.41 g, 91 %). A solution of *N*-lithiotrifluoromethanesulfonimide (8.52 g, 29.7 mmol) in deionised water (30 mL) was added to the aqueous solution of the functional tetraalkylammonium iodide (8.41 g, 19.2 mmol) and the suspension was stirred vigorously for 20 h at room temperature. The top aqueous layer was removed, the ionic liquid washed with deionised water (5×20 ml). The product was dried at 70°C *in vacuo* yielding the product as viscous pale yellow oil (15.3 g, 68.6 %).

<sup>1</sup>H NMR: 0.82 (t, *J* = 7.2 Hz, 6H, CH<sub>3</sub>(CH<sub>2</sub>)<sub>3</sub>O), 1.31 (q, 4H, *J* = 7.5 Hz CH<sub>3</sub>CH<sub>2</sub>(CH<sub>2</sub>)<sub>2</sub>O), 1.52 (q, *J* = 7.3 Hz, 4H, CH<sub>3</sub>CH<sub>2</sub>CH<sub>2</sub>CH<sub>2</sub>O), 1.95 (m, 2H, NHCH<sub>2</sub>CH<sub>2</sub>CH<sub>2</sub>N(CH<sub>3</sub>)<sub>3</sub>), 2.94 (m, 2H, NHCH<sub>2</sub>CH<sub>2</sub>CH<sub>2</sub>N(CH<sub>3</sub>)<sub>3</sub>), 3.08 (s, 9H, N(CH<sub>3</sub>)<sub>3</sub>), 3.41 (m, 2H, NHCH<sub>2</sub>CH<sub>2</sub>CH<sub>2</sub>N(CH<sub>3</sub>)<sub>3</sub>), 3.86 (q, *J* = 7.0 Hz, 8H, OCH<sub>2</sub>CH<sub>2</sub>)  
<sup>31</sup>P NMR: 10.06

**<sup>13</sup>C NMR** 13.50 (s, CH<sub>3</sub>), 18.71, 24.95 (two singlets, CH<sub>2</sub>), 32.31 (d, *J* = 6.2, CH<sub>2</sub>CH<sub>2</sub>N), 53.39 (N(CH<sub>3</sub>)<sub>3</sub>), 64.8 (CH<sub>2</sub>N) 66.4 (d, *J* = 6.7, CH<sub>2</sub>O), 118.3 (q, *J* = 320.4, CF<sub>3</sub>)

**HRMS** (ESI) *m/z* (%): calcd for C<sub>14</sub>H<sub>34</sub>N<sub>2</sub>O<sub>3</sub>P (M<sup>+</sup>) 309.2302, found 309.2220

**Anal.** calcd for C<sub>16</sub>H<sub>34</sub>F<sub>6</sub>N<sub>3</sub>O<sub>7</sub>PS<sub>2</sub>: C, 32.60; H, 5.81; N, 7.13, found: C, 32.21; H, 5.99; N, 7.08

### TSIL 3:

To a solution of *N,N*-dimethylethanolamine (5.84 g, 65.59 mmol) and triethylamine (7.3 g, 72.15 mmol) in diethylether (60 ml) was added dropwise a solution of dibutylchlorophosphate (15.0 g, 65.59 mmol) in diethylether (20 ml) at 5°C under vigorous stirring. The reaction mixture was stirred for 5 h at room temperature then triethylamine chloride was removed by filtration. Evaporation of the solvent yielded the product as colourless oil (15.01 g, 81%).

To a solution of dibutyl (*N,N*- dimethylethylamine) phosphate (15.03 g, 53.43 mmol) in diethylether (60 ml) was added a solution of iodide methyl (7.58 g, 53.43 mmol) in diethylether (20 ml) at 5°C under vigorous stirring. The reaction mixture was stirred at room temperature for 3 h. The precipitate was filtered, washed with diethyl ether (3×20 ml) and dried under reduced pressure during 4 h. yielding the product was obtained as a white solid (15.39 g, 68 %). The same procedure described above for **2** was used for metathesis. **3** was obtained as a pale yellow oil (9.10 g, 79 %) from tetraalkylammonium iodide salt (8.5 g, 20 mmol) and LiNTf<sub>2</sub> (6.9 g, 24 mmol).

**<sup>1</sup>H NMR**: 0.79 (t, *J* = 7.2 Hz, 6H, CH<sub>3</sub>(CH<sub>2</sub>)<sub>3</sub>O), 1.24 (q, 4H, *J* = 7.3 Hz CH<sub>3</sub>CH<sub>2</sub>(CH<sub>2</sub>)<sub>2</sub>O), 1.58 (q, *J* = 7.3 Hz, 4H, CH<sub>3</sub>CH<sub>2</sub>CH<sub>2</sub>CH<sub>2</sub>O), 3.08 (s, 9H, N(CH<sub>3</sub>)<sub>3</sub>), 3.52 (m, 2H, PCH<sub>2</sub>), 3.3.93 (q, *J* = 7.0 Hz, 8H, OCH<sub>2</sub>CH<sub>2</sub>), 4.26 (m, 2H, POCH<sub>2</sub>CH<sub>2</sub>N)

**<sup>31</sup>P NMR**: 0.61

**<sup>13</sup>C NMR** 13.3 (s, CH<sub>3</sub>), 18.4 (s, CH<sub>2</sub>), 32.0 (d, *J* = 6.2, CH<sub>2</sub>CH<sub>2</sub>O), 54.2 (s, N(CH<sub>3</sub>)<sub>3</sub>), 60.7 (s, CH<sub>2</sub>N) 68.3 (d, *J* = 6.7, CH<sub>2</sub>O), 118.4 (q, *J* = 320.4, CF<sub>3</sub>)

**HRMS** (ESI) *m/z* (%): calcd for C<sub>13</sub>H<sub>31</sub>NO<sub>4</sub>P (M<sup>+</sup>) 296.1985, found 296.1967

**Anal.** calcd for C<sub>15</sub>H<sub>31</sub>F<sub>6</sub>N<sub>2</sub>O<sub>8</sub>PS<sub>2</sub>: C, 31.25; H, 5.42; N, 4.86, found: C, 30.81; H, 5.52; N, 4.77

### TSIL 5:

To a solution of diethyl vinylphosphonate (11.79 g, 53.5 mmol) in ethanol (50 ml) was added diethylamine (7.83 g, 107.0 mmol). The mixture was stirred for 72 h and then concentrated to dryness; the residue was taken up in 30 ml of diethyl ether and ethyl iodide (50.93 g, 56.0 mmol) was added. After stirring one night, the precipitate was filtered and washed twice with diethyl ether (15 ml). The product was isolated as a yellow powder (16.63 g, 69.2 %). The same procedure as described above for **2** was used for metathesis. **5** was obtained as a pale yellow oil (15.3 g, 68.6 %) from tetraalkylammonium iodide salt (16.63 g, 370 mmol) and LiNTf<sub>2</sub> (11.59 g, 400 mmol).

**<sup>1</sup>H NMR**: 0.96 (t, *J* = 7.2 Hz, 6H, CH<sub>3</sub>CH<sub>2</sub>N), 1.33 (t, *J* = 7.2 Hz, 9H, CH<sub>3</sub>(CH<sub>2</sub>)<sub>3</sub>O), 1.37 (m, 4H, CH<sub>3</sub>CH<sub>2</sub>(CH<sub>2</sub>)<sub>2</sub>O), 1.71 (q, *J* = 7.3 Hz, 4H, CH<sub>3</sub>CH<sub>2</sub>CH<sub>2</sub>CH<sub>2</sub>O), 1.98 (m, 2H, PCH<sub>2</sub>CH<sub>2</sub>), 3.12 (q, *J* = 7.1 Hz, 8H, CH<sub>2</sub>N), 3.89 (q, *J* = 7.0, 4H, OCH<sub>2</sub>)

**<sup>31</sup>P NMR**: 24.7

**<sup>13</sup>C NMR:** 13.1, 13.4 (two singlets, CH<sub>3</sub>), 18.3 (d,  $J = 138.5$ , O=PCH<sub>2</sub>), 20.1 (s, CH<sub>2</sub>), 32.4 (d,  $J = 6.2$ , CH<sub>2</sub>CH<sub>2</sub>O), 53.0 (s, N(CH<sub>2</sub>)<sub>4</sub>), 66.6 (d,  $J = 6.7$ , CH<sub>2</sub>O), 118.3 (q,  $J = 320.4$ , CF<sub>3</sub>)  
**HRMS** (ESI)  $m/z$  (%): calcd for C<sub>16</sub>H<sub>37</sub>NO<sub>3</sub>P (M<sup>+</sup>) 322.2506, found 322.2387  
**Anal.** calcd for C<sub>18</sub>H<sub>37</sub>F<sub>6</sub>N<sub>2</sub>O<sub>7</sub>PS<sub>2</sub>: C, 35.88; H, 6.19; N, 4.65, found: C, 35.79; H, 6.07; N, 4.63

### Extraction:

Extraction was performed by mixing 0.8 mL of the RTIL phase and 0.8 mL of the aqueous phase followed by vortexing (5 min) and centrifugation (5000 rpm) to equilibrate the phases. Extraction were performed in duplicate for each TSIL by shaking equal volumes of pre-equilibrated organic phase and aqueous phase on a vibrating mixer at room temperature for 3 hours. Phases were separated by centrifugation; uptake of uranium by ionic liquid phase was measured by determining the remaining <sup>238</sup>U in the aqueous solutions with inductively coupled plasma mass spectroscopy (ICP-MS).

The distribution coefficients  $D_U$  for extraction of <sup>238</sup>U are defined as  $D_U = (C_i - C_f) / C_f$  where  $C_i$  and  $C_f$  represent the initial and final concentrations of <sup>238</sup>U in the aqueous phase.

Each experiment was done in duplicate and the results agreed to within 5%.
